# Supplementary material for: Microscale thermophoresis as a powerful tool for screening glycosyltransferases involved in cell wall biosynthesis
Source: PubMed Central journal article supplement (PMC7389378; doi:10.1186/s13007-020-00641-1), 2020-07-28
Supplement: 13007_2020_641_MOESM1_ESM.pdf [file 13007_2020_641_MOESM1_ESM.pdf]

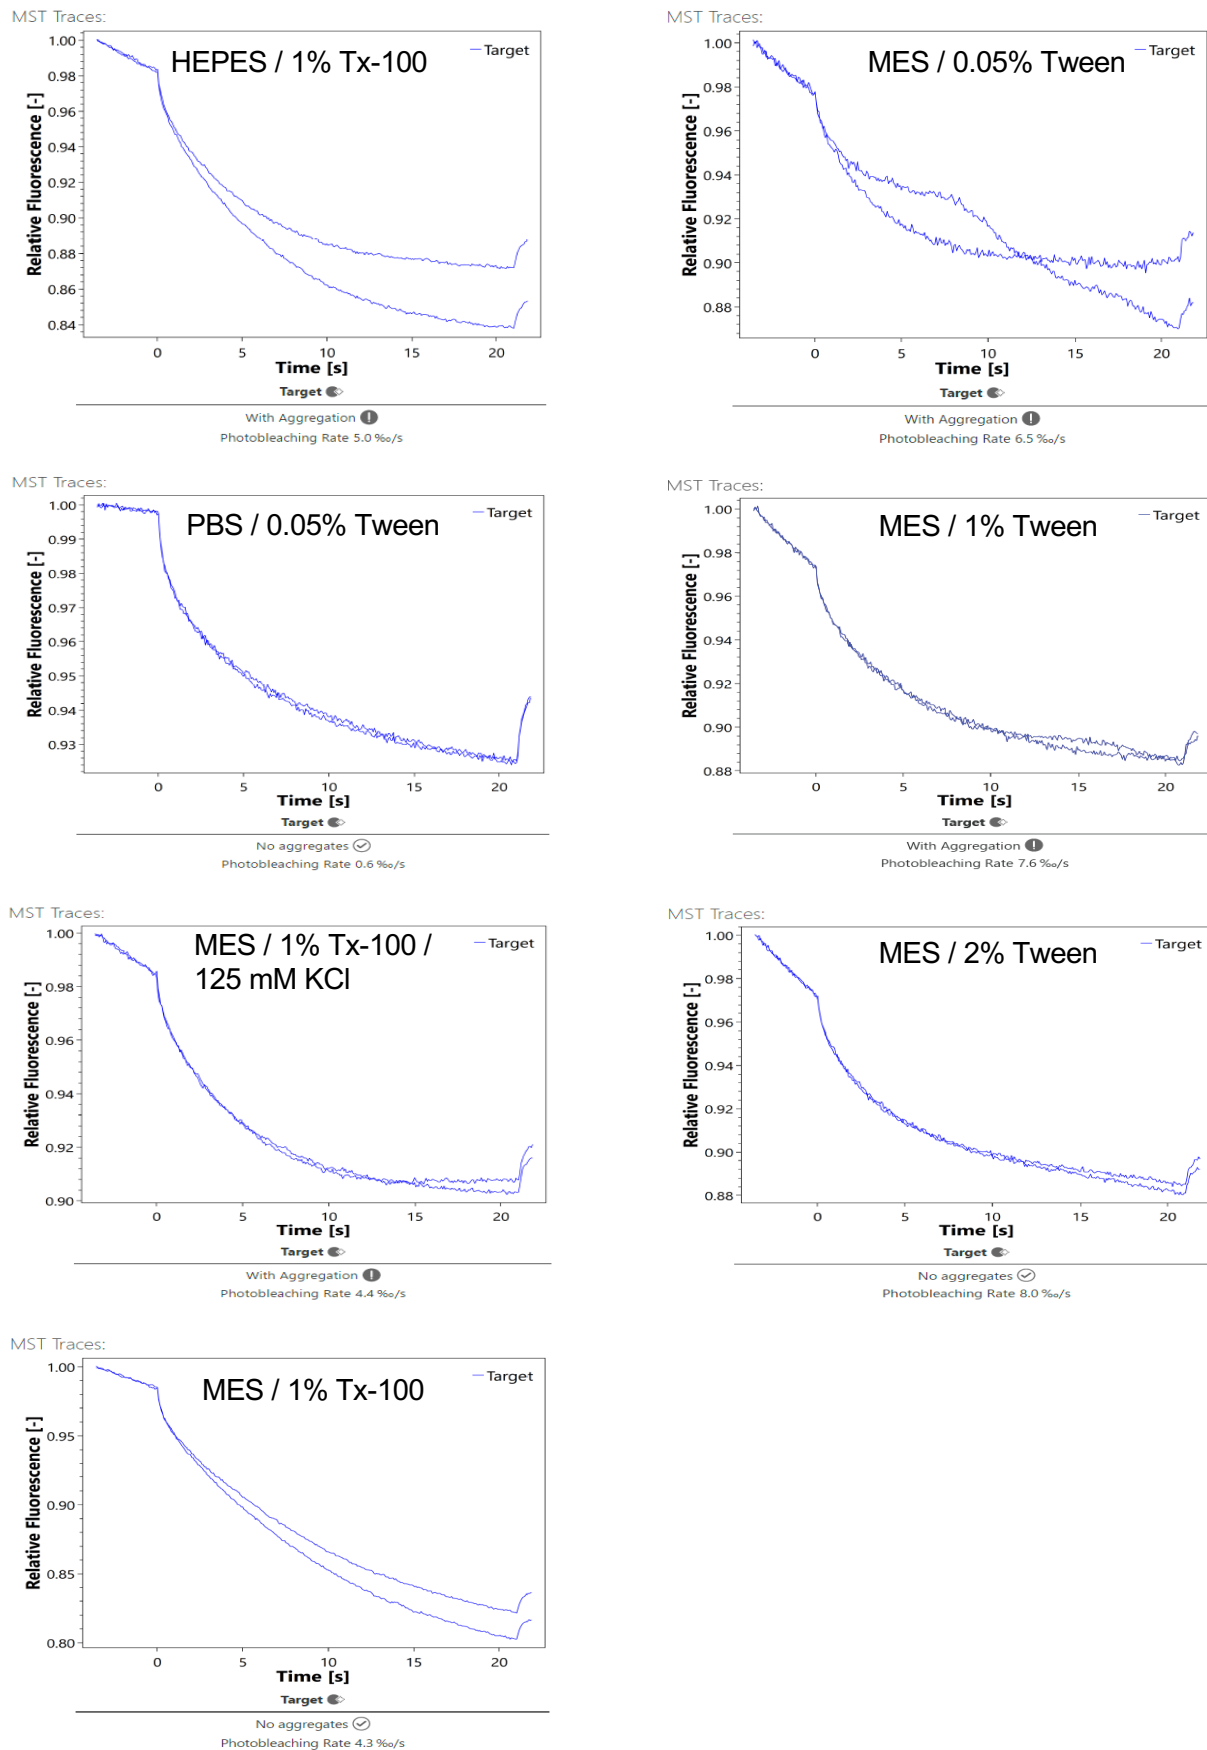

**Fig S1.** Thermographs corresponding to the different buffer conditions shown in Table 1. Some of the conditions resulted in bumpy curves indicating aggregation. MES / 1% Triton X-100 did not show aggregation and had higher fluorescence yield. Therefore, this condition was chosen for subsequent experiments

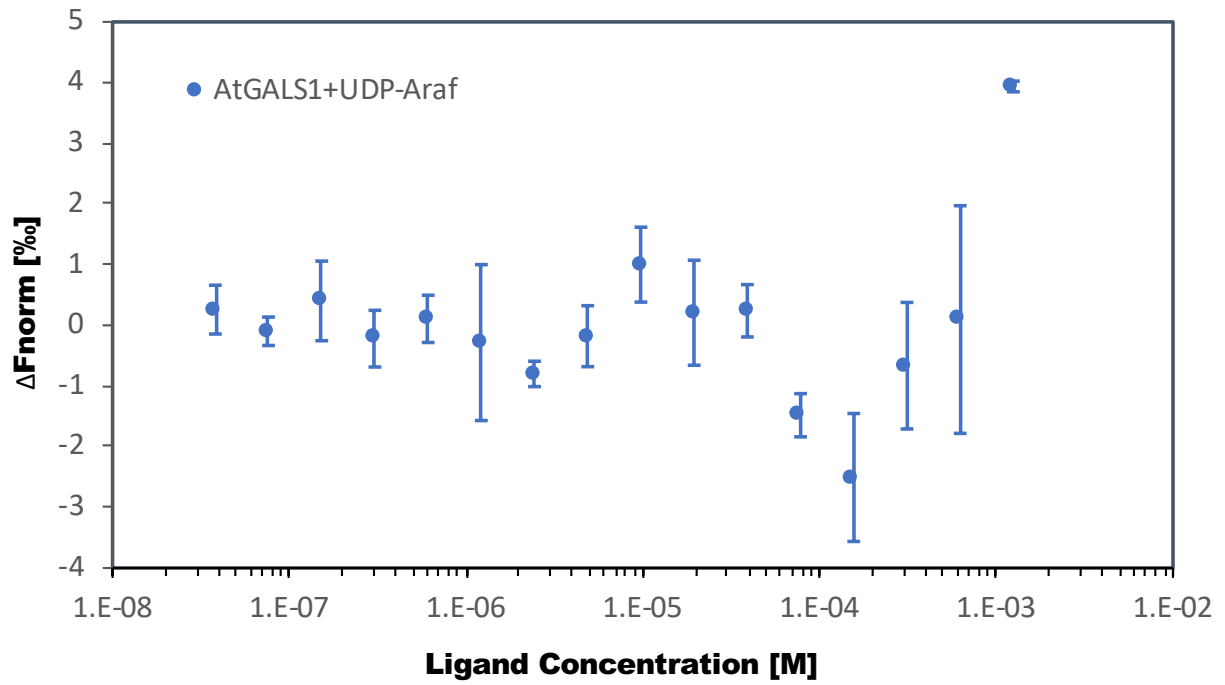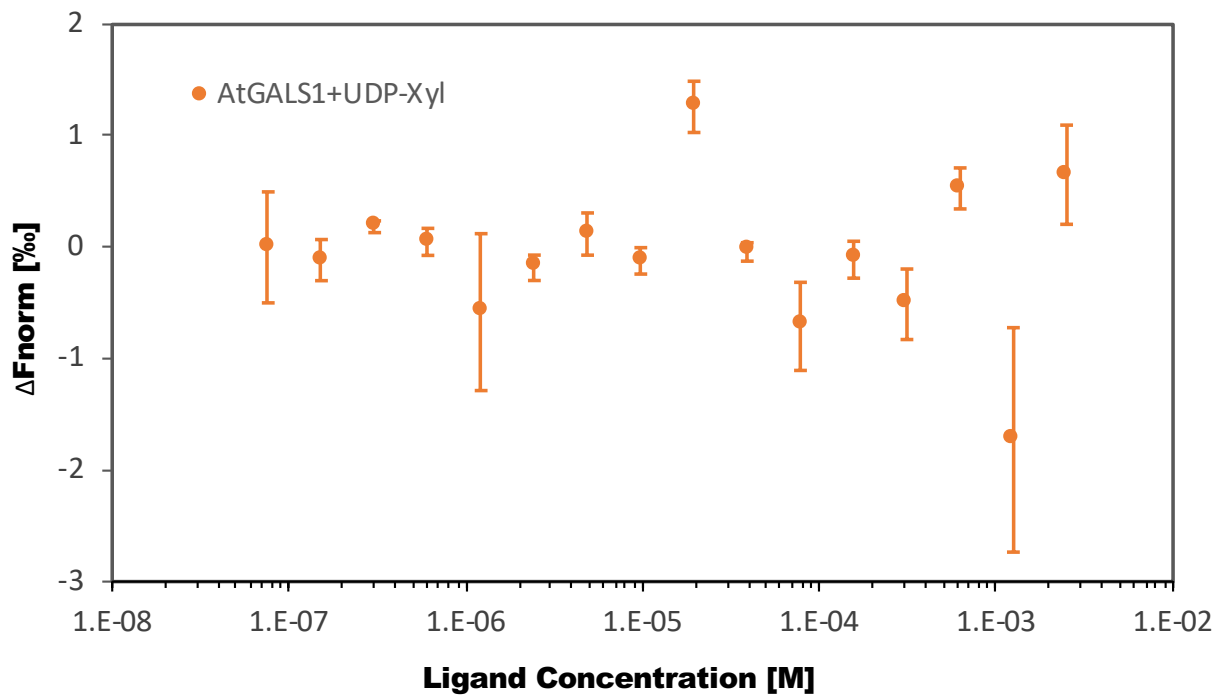

**Fig S2.** AtGALS1 expressed in *Nicotiana benthamiana* has no detectable binding with UDP-Ara<sub>f</sub> or UDP-Xyl.

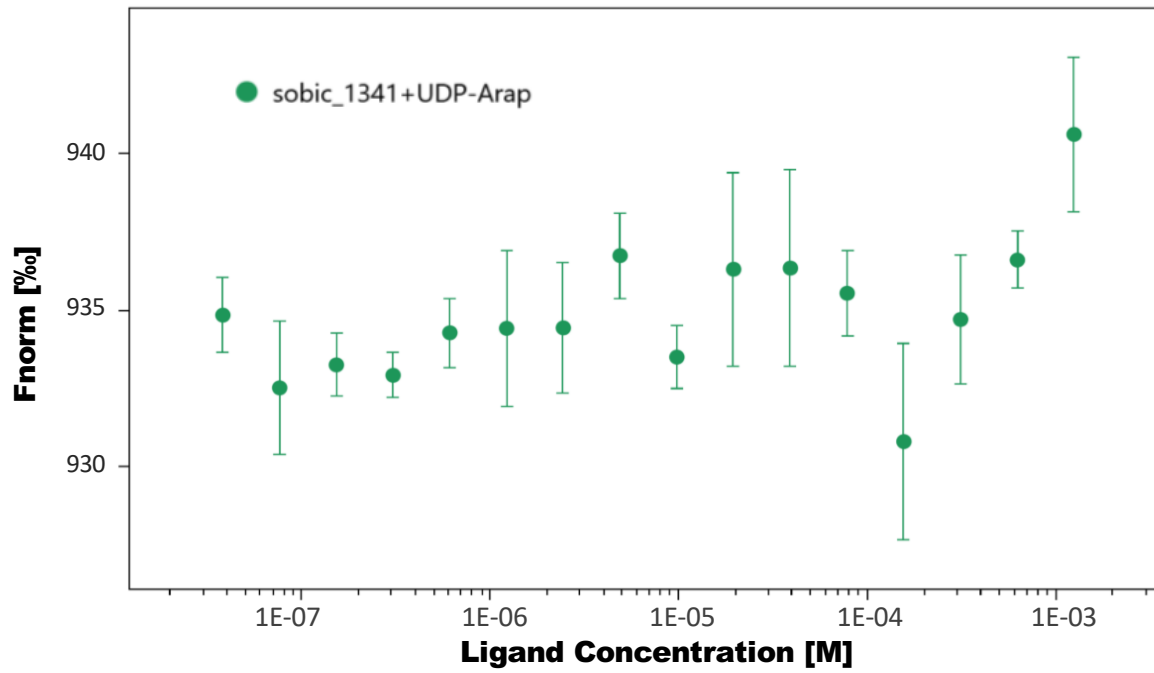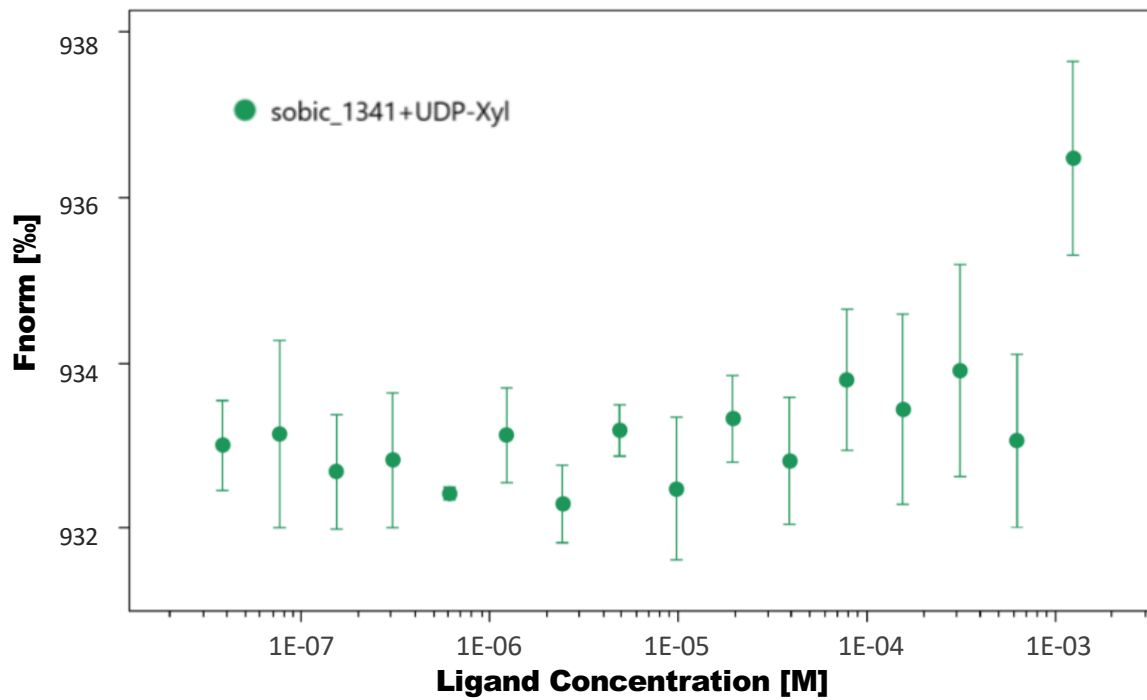

**Fig S3.** *Sobic\_004G134100* expressed in *Nicotiana benthamiana* has no detectable binding with UDP-Ara<sub>p</sub> or UDP-Xyl.

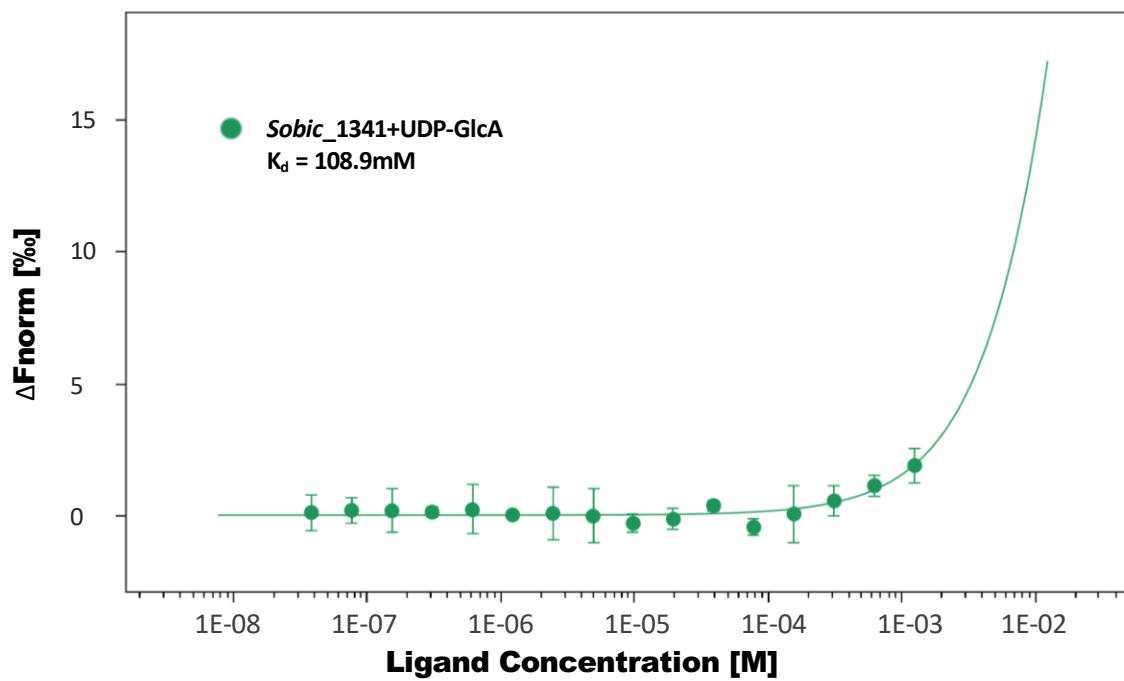

**Fig S4.** *Sobic\_004G134100* expressed in *Nicotiana benthamiana* has very weak binding with UDP-GlcA ( $K_d > 0.1$  M).
